# Supplementary material
Source: Elsevier journal article supplement (https://www.sciencedirect.com/science/article/pii/S2173574314000641)
Supplement: mmc1 [file S2173574314000641:mmc1.pdf]

**Anexo 1**  
**Cuestionario de Calidad de Vida específica AMICAL**  
**Artrosis de Miembros Inferiores y Calidad de Vida**

# Artrosis de Miembros Inferiores y Calidad de Vida (AMICAL)

El uso de este Cuestionario requiere notificación previa a los autores de esta publicación: María Victoria Goycochea-Robles M.D., Gisela Espinosa-Cuervo M.D.

Le agradecemos que lea atentamente las siguientes instrucciones:

Las siguientes frases tratan sobre las modificaciones causadas por su artrosis de rodilla y/o de cadera en su calidad de vida. Esta información nos permitirá comprender mejor de qué manera usted **vive diariamente** con su artrosis.

☞ Marque la respuesta que mejor corresponde a su situación,

entre “en absoluto” y “por completo”,

entre “en absoluto” y “en exceso”,

entre “nunca” y “siempre”,...

de acuerdo con las frases propuestas.

No hay respuestas correctas o incorrectas.

☞ Para cada frase marque sólo una respuesta (☑)

Ejemplo:

|                                       | “En absoluto”            |                          |                          |                          |                          | “En exceso”              |                          |                          |                          |                          |
|---------------------------------------|--------------------------|--------------------------|--------------------------|--------------------------|--------------------------|--------------------------|--------------------------|--------------------------|--------------------------|--------------------------|
| Tengo dificultad para subir escaleras | <input type="checkbox"/> |
|                                       | 1                        | 2                        | 3                        | 4                        | 5                        | 6                        | 7                        | 8                        | 9                        | 10                       |

Este cuestionario es de 4 páginas (incluyendo ésta)

Lea las siguientes frases, una por una, con atención pensando en su calidad de vida DURANTE LAS ÚLTIMAS 4 SEMANAS.

Marque (☑) la respuesta que mejor corresponde a la situación que vive por su artrosis:

|                                                                                                                 | En absoluto                                                                                                                                                                                                                                               | En exceso                                                                                                                                                                                                                                                 |
|-----------------------------------------------------------------------------------------------------------------|-----------------------------------------------------------------------------------------------------------------------------------------------------------------------------------------------------------------------------------------------------------|-----------------------------------------------------------------------------------------------------------------------------------------------------------------------------------------------------------------------------------------------------------|
| 1. Tengo dificultad para caminar                                                                                | <input type="checkbox"/> | <input type="checkbox"/> |
|                                                                                                                 | 1 2 3 4 5 6 7 8 9 10                                                                                                                                                                                                                                      |                                                                                                                                                                                                                                                           |
| 2. Tengo dificultad para agacharme o levantarme                                                                 | <input type="checkbox"/> | <input type="checkbox"/> |
|                                                                                                                 | 1 2 3 4 5 6 7 8 9 10                                                                                                                                                                                                                                      |                                                                                                                                                                                                                                                           |
| 3. Tengo dificultad para cargar cosas pesadas                                                                   | <input type="checkbox"/> | <input type="checkbox"/> |
|                                                                                                                 | 1 2 3 4 5 6 7 8 9 10                                                                                                                                                                                                                                      |                                                                                                                                                                                                                                                           |
| 4. Tengo dificultad para bajar escaleras                                                                        | <input type="checkbox"/> | <input type="checkbox"/> |
|                                                                                                                 | 1 2 3 4 5 6 7 8 9 10                                                                                                                                                                                                                                      |                                                                                                                                                                                                                                                           |
| 5. Tengo dificultad para subir escaleras                                                                        | <input type="checkbox"/> | <input type="checkbox"/> |
|                                                                                                                 | 1 2 3 4 5 6 7 8 9 10                                                                                                                                                                                                                                      |                                                                                                                                                                                                                                                           |
| 6. Tengo dificultad para bañarme                                                                                | <input type="checkbox"/> | <input type="checkbox"/> |
|                                                                                                                 | 1 2 3 4 5 6 7 8 9 10                                                                                                                                                                                                                                      |                                                                                                                                                                                                                                                           |
| 7. Tengo dificultad para vestirme<br>(ponerme <b>los</b> calcetines, medias, zapatos,...)                       | <input type="checkbox"/> | <input type="checkbox"/> |
|                                                                                                                 | 1 2 3 4 5 6 7 8 9 10                                                                                                                                                                                                                                      |                                                                                                                                                                                                                                                           |
| 8. Tengo dificultad para cortarme las uñas de los pies                                                          | <input type="checkbox"/> | <input type="checkbox"/> |
|                                                                                                                 | 1 2 3 4 5 6 7 8 9 10                                                                                                                                                                                                                                      |                                                                                                                                                                                                                                                           |
| 9. Tengo dificultad para ponerme nuevamente en movimiento<br>después de estar mucho tiempo en la misma posición | <input type="checkbox"/> | <input type="checkbox"/> |
|                                                                                                                 | 1 2 3 4 5 6 7 8 9 10                                                                                                                                                                                                                                      |                                                                                                                                                                                                                                                           |
| 10. Tengo dificultad para entrar o salir de un auto                                                             | <input type="checkbox"/> | <input type="checkbox"/> |
|                                                                                                                 | 1 2 3 4 5 6 7 8 9 10                                                                                                                                                                                                                                      |                                                                                                                                                                                                                                                           |
| 11. Tengo dificultad para abordar los transportes colectivos<br>(autobús, pesero, tren, metro,...)              | <input type="checkbox"/> | <input type="checkbox"/> |
|                                                                                                                 | 1 2 3 4 5 6 7 8 9 10                                                                                                                                                                                                                                      |                                                                                                                                                                                                                                                           |
| No uso transportes colectivos                                                                                   | <input type="checkbox"/>                                                                                                                                                                                                                                  |                                                                                                                                                                                                                                                           |
| 12. Me veo limitado(a) en mi actividad laboral                                                                  | <input type="checkbox"/> | <input type="checkbox"/> |
|                                                                                                                 | 1 2 3 4 5 6 7 8 9 10                                                                                                                                                                                                                                      |                                                                                                                                                                                                                                                           |
| No trabajo                                                                                                      | <input type="checkbox"/>                                                                                                                                                                                                                                  |                                                                                                                                                                                                                                                           |
| 13. Tengo la obligación de cuidarme                                                                             | <input type="checkbox"/> | <input type="checkbox"/> |
|                                                                                                                 | 1 2 3 4 5 6 7 8 9 10                                                                                                                                                                                                                                      |                                                                                                                                                                                                                                                           |
| 14. Me toma más tiempo hacer las cosas                                                                          | <input type="checkbox"/> | <input type="checkbox"/> |
|                                                                                                                 | 1 2 3 4 5 6 7 8 9 10                                                                                                                                                                                                                                      |                                                                                                                                                                                                                                                           |
| 15. Me siento moralmente decaído(a) a causa del dolor                                                           | <input type="checkbox"/> | <input type="checkbox"/> |
|                                                                                                                 | 1 2 3 4 5 6 7 8 9 10                                                                                                                                                                                                                                      |                                                                                                                                                                                                                                                           |
| 16. Tengo miedo de depender de los otros                                                                        | <input type="checkbox"/> | <input type="checkbox"/> |
|                                                                                                                 | 1 2 3 4 5 6 7 8 9 10                                                                                                                                                                                                                                      |                                                                                                                                                                                                                                                           |

Lea las siguientes frases, una por una, con atención pensando en su calidad de vida DURANTE LAS ÚLTIMAS 4 SEMANAS.

Marque (☑) la respuesta que mejor corresponde a la situación que vive por su artrosis:

|                                                           | En absoluto                                                                                                                                                                                                                                               | En exceso |
|-----------------------------------------------------------|-----------------------------------------------------------------------------------------------------------------------------------------------------------------------------------------------------------------------------------------------------------|-----------|
| 17. Tengo miedo de ser un(a) inválido(a)                  | <input type="checkbox"/> |           |
|                                                           | 1 2 3 4 5 6 7 8 9 10                                                                                                                                                                                                                                      |           |
| 18. Me siento incómodo(a) por la mirada de los demás      | <input type="checkbox"/> |           |
|                                                           | 1 2 3 4 5 6 7 8 9 10                                                                                                                                                                                                                                      |           |
| 19. Estoy ansioso(a)                                      | <input type="checkbox"/> |           |
|                                                           | 1 2 3 4 5 6 7 8 9 10                                                                                                                                                                                                                                      |           |
| 20. Estoy deprimido(a)                                    | <input type="checkbox"/> |           |
|                                                           | 1 2 3 4 5 6 7 8 9 10                                                                                                                                                                                                                                      |           |
| 21. Estoy incómodo(a) en mi vida familiar                 | <input type="checkbox"/> |           |
|                                                           | 1 2 3 4 5 6 7 8 9 10                                                                                                                                                                                                                                      |           |
| 22. Estoy incómodo(a) en mi vida de pareja                | <input type="checkbox"/> |           |
|                                                           | 1 2 3 4 5 6 7 8 9 10                                                                                                                                                                                                                                      |           |
| No vivo en pareja                                         | <input type="checkbox"/>                                                                                                                                                                                                                                  |           |
| 23. Estoy limitado(a) en mis relaciones sexuales          | <input type="checkbox"/> |           |
|                                                           | 1 2 3 4 5 6 7 8 9 10                                                                                                                                                                                                                                      |           |
| No he tenido relaciones sexuales en las últimas 4 semanas | <input type="checkbox"/>                                                                                                                                                                                                                                  |           |

|                                                                                                  | Nunca                                                                                                                                                                                                                                                     | Siempre |
|--------------------------------------------------------------------------------------------------|-----------------------------------------------------------------------------------------------------------------------------------------------------------------------------------------------------------------------------------------------------------|---------|
| 24. Tengo dificultad de quedarme en la misma posición mucho tiempo (sentado(a), de pie, inmóvil) | <input type="checkbox"/> |         |
|                                                                                                  | 1 2 3 4 5 6 7 8 9 10                                                                                                                                                                                                                                      |         |
| 25. Necesito un bastón (o muletas) para caminar                                                  | <input type="checkbox"/> |         |
|                                                                                                  | 1 2 3 4 5 6 7 8 9 10                                                                                                                                                                                                                                      |         |
| 26. Sufro de dolores (frecuencia)                                                                | <input type="checkbox"/> |         |
|                                                                                                  | 1 2 3 4 5 6 7 8 9 10                                                                                                                                                                                                                                      |         |

|                                   | En absoluto                                                                                                                                                                                                                                               | Insoportables |
|-----------------------------------|-----------------------------------------------------------------------------------------------------------------------------------------------------------------------------------------------------------------------------------------------------------|---------------|
| 27. Sufro de dolores (intensidad) | <input type="checkbox"/> |               |
|                                   | 1 2 3 4 5 6 7 8 9 10                                                                                                                                                                                                                                      |               |

|                                                        | En absoluto                                                                                                                                                                                                                                               | Por completo |
|--------------------------------------------------------|-----------------------------------------------------------------------------------------------------------------------------------------------------------------------------------------------------------------------------------------------------------|--------------|
| 28. Necesito ayuda (quehacer doméstico, hacer compras) | <input type="checkbox"/> |              |
|                                                        | 1 2 3 4 5 6 7 8 9 10                                                                                                                                                                                                                                      |              |
| 29. Tengo la impresión de envejecer antes de lo debido | <input type="checkbox"/> |              |
|                                                        | 1 2 3 4 5 6 7 8 9 10                                                                                                                                                                                                                                      |              |

Lea las siguientes frases, una por una, con atención pensando en su calidad de vida DURANTE LAS ÚLTIMAS 4 SEMANAS.

Marque (☑) la respuesta que mejor corresponde a la situación que vive por su artrosis:

|                                                                                                    | En absoluto                                                                                                                                                                                                                                               | Por completo                                                                                                                                                                                                                                              |
|----------------------------------------------------------------------------------------------------|-----------------------------------------------------------------------------------------------------------------------------------------------------------------------------------------------------------------------------------------------------------|-----------------------------------------------------------------------------------------------------------------------------------------------------------------------------------------------------------------------------------------------------------|
| 30. Soy capaz de hacer planes a largo plazo                                                        | <input type="checkbox"/> | <input type="checkbox"/> |
|                                                                                                    | 1 2 3 4 5 6 7 8 9 10                                                                                                                                                                                                                                      |                                                                                                                                                                                                                                                           |
| 31. Salgo de mi domicilio tan seguido como lo deseo                                                | <input type="checkbox"/> | <input type="checkbox"/> |
|                                                                                                    | 1 2 3 4 5 6 7 8 9 10                                                                                                                                                                                                                                      |                                                                                                                                                                                                                                                           |
| 32. Recibo visitas tan seguido como lo deseo                                                       | <input type="checkbox"/> | <input type="checkbox"/> |
|                                                                                                    | 1 2 3 4 5 6 7 8 9 10                                                                                                                                                                                                                                      |                                                                                                                                                                                                                                                           |
|                                                                                                    | Nunca                                                                                                                                                                                                                                                     | Todo el tiempo                                                                                                                                                                                                                                            |
| 33. Me cuesta trabajo dormir o volver a dormir a causa de los dolores                              | <input type="checkbox"/> | <input type="checkbox"/> |
|                                                                                                    | 1 2 3 4 5 6 7 8 9 10                                                                                                                                                                                                                                      |                                                                                                                                                                                                                                                           |
| 34. Me despierto a causa de los dolores                                                            | <input type="checkbox"/> | <input type="checkbox"/> |
|                                                                                                    | 1 2 3 4 5 6 7 8 9 10                                                                                                                                                                                                                                      |                                                                                                                                                                                                                                                           |
| 35. Me pregunto qué va a ser de mí                                                                 | <input type="checkbox"/> | <input type="checkbox"/> |
|                                                                                                    | 1 2 3 4 5 6 7 8 9 10                                                                                                                                                                                                                                      |                                                                                                                                                                                                                                                           |
| 36. Estoy irritable, agresivo(a)                                                                   | <input type="checkbox"/> | <input type="checkbox"/> |
|                                                                                                    | 1 2 3 4 5 6 7 8 9 10                                                                                                                                                                                                                                      |                                                                                                                                                                                                                                                           |
| 37. Tengo la impresión de mortificar a los que me rodean                                           | <input type="checkbox"/> | <input type="checkbox"/> |
|                                                                                                    | 1 2 3 4 5 6 7 8 9 10                                                                                                                                                                                                                                      |                                                                                                                                                                                                                                                           |
|                                                                                                    | En absoluto                                                                                                                                                                                                                                               | En exceso                                                                                                                                                                                                                                                 |
| 38. Tengo temor de los efectos secundarios de mi tratamiento                                       | <input type="checkbox"/> | <input type="checkbox"/> |
|                                                                                                    | 1 2 3 4 5 6 7 8 9 10                                                                                                                                                                                                                                      |                                                                                                                                                                                                                                                           |
| 39. Puedo hablar con los demás sobre los problemas que causa mi artrosis tan seguido como lo deseo | <input type="checkbox"/> | <input type="checkbox"/> |
|                                                                                                    | 1 2 3 4 5 6 7 8 9 10                                                                                                                                                                                                                                      |                                                                                                                                                                                                                                                           |
| 40. Pienso que los demás comprenden los problemas que causa mi artrosis                            | <input type="checkbox"/> | <input type="checkbox"/> |
|                                                                                                    | 1 2 3 4 5 6 7 8 9 10                                                                                                                                                                                                                                      |                                                                                                                                                                                                                                                           |
| 41. Me siento apenado(a) al pedir ayuda si la necesito                                             | <input type="checkbox"/> | <input type="checkbox"/> |
|                                                                                                    | 1 2 3 4 5 6 7 8 9 10                                                                                                                                                                                                                                      |                                                                                                                                                                                                                                                           |
| 42. Me siento apoyado(a) por las personas más <b>cercanas</b> (pareja, familia,...)                | <input type="checkbox"/> | <input type="checkbox"/> |
|                                                                                                    | 1 2 3 4 5 6 7 8 9 10                                                                                                                                                                                                                                      |                                                                                                                                                                                                                                                           |
| 43. Me siento apoyado(a) por las personas de mi entorno (amigos, vecinos, colegas,...)             | <input type="checkbox"/> | <input type="checkbox"/> |
|                                                                                                    | 1 2 3 4 5 6 7 8 9 10                                                                                                                                                                                                                                      |                                                                                                                                                                                                                                                           |

Verifique por favor que sólo haya marcado una y sólo 1 opción en cada una de las 43 frases.

Gracias por haber accedido a responder este cuestionario.
